# Supplementary material
Source: publisher site journal article supplement (https://www.jstage.jst.go.jp/article/oubutsu/91/3/91_155/_supplement/_download/91_155_1.pdf)
Supplement: Supplementary file 1 [file 91_155_1.pdf]

# シリコン原子はどこへ行く?まだまだ不思議な熱酸化

影島 博之, 秋山 亨, 白石 賢二, 植松 真司

## Supplemental Material 「平坦な Si の熱酸化過程」

### S 1 Deal-Grove 理論と Si 結晶中格子間 Si 濃度上昇

平坦シリコン(Si)の酸化過程は、古典的には(1)Si 酸化膜中の  $O_2$  分子の拡散過程と、(2)Si 酸化膜/Si 界面での反応過程の、2つの素過程で理解されてきた。この見方に則して一次元の拡散方程式と反応速度方程式を連立させ、酸化時間と酸化膜厚の関係を示したのが Deal-Grove 理論である[1](図 S1)。この理論は界面反応であることを前提条件として構築されており、同位体を用いた実験でその前提条件が正しいことが確認され、また様々な酸化条件の実験結果を統一的に説明することができた[2,3]。

このように Deal-Grove 理論は成功している理論である

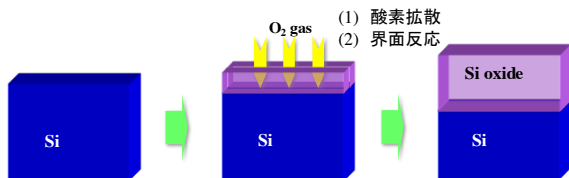

図 S1. Deal-Grove 理論で考えるシリコン酸化過程の素過程

が、説明できない現象が当初から存在する。その代表が初期増速酸化現象である(図 S2)[1]。酸化膜が極めて薄い極初期の酸化膜厚の増加が、Deal-Grove 理論の予測よりも遙かに速いという現象であり、酸化膜厚が 30nm 以下の場合に顕著に表れる。これ以外にも、同位体を使った実験では酸化膜の表面付近でも若干ながら酸化反応が起こっており、また Si 酸化膜中や界面に固定電荷や欠陥が形成されるが、これらも Deal-Grove 理論では説明できない。

Deal-Grove 理論は  $O_2$  分子の輸送現象のみに注目しているが、熱酸化中には Si 原子についても輸送現象が発生する。Si 結晶中へ格子間 Si 原子が界面から流れ、酸化増速拡散(OED)、酸化減速拡散(ORD)、酸化誘起積層欠陥(OSF)を引き起こす[4-8]。Si 酸化膜の原子構造を Si 結晶と比較すると、Si 結晶の Si 原子間に O 原子が挿入された構造となっている。このため、Si 結晶が Si 酸化膜に変わる時、

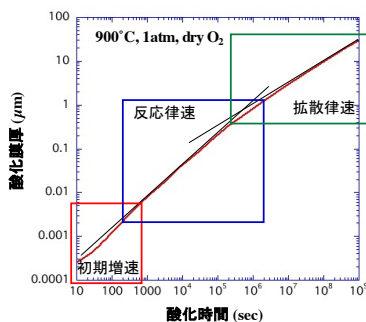

図 2. 平坦 Si における酸化時間と酸化膜厚の関係

2.25 倍の体積膨張を伴う。酸化膜界面でこの体積膨張が起こるならば、面直方向の体積膨張のみが許されるはずで、このため大きな歪みが発生し、Si 酸化膜の粘性流動によってこれが緩和されるはずである。そしてこの体積膨張に伴い、界面で格子間 Si 原子が発生するものと考えられる[9-11]。発生した格子間 Si 原子は、当然のことながら基板 Si 結晶のみならず Si 酸化膜中にも拡散し、あるいは界面で Si として析出/再成長すると考えられている[12-15]。

### S 2 Si 放出理論

このような知見を礎として Deal-Grove 理論で説明できない問題を解決する理論として我々が考え出したのが、Si 放出理論である(本文図 1)[16]。界面から格子間 Si 原子が発生することを示した我々の第一原理計算による研究では、(100)面では粘性流動を考えないと体積膨張を緩和するために最大 30%程度の格子間 Si 原子が発生する[10,11]。であるなら逆に、格子間 Si 原子が発生できないと酸化反応自体が進まないであろう、というのがそもそもの発想である。もう一点従来と違うのは、発生した格子間 Si 原子が基板 Si 結晶中へ拡散するだけで無く酸化膜中へ拡散、そこで酸素と反応して酸化膜へ吸収されていくはずであることに着目した点である。ならば酸化膜が極めて薄い場合には、大量に発生した格子間 Si 原子はほとんどが酸化膜を貫通して表面に達し、そこに析出して酸化されるだろう。従来は酸化膜厚がそこまで薄くない場合を想定していたので、酸化膜中の量は基板 Si 結晶中に流れるわずかな量とほとんど変わらず、酸化膜の奥までは到達しないとしていた[13]。このように考えると、界面で発生した Si 原子の酸化膜表面への析出酸化や酸化膜中での酸化吸収が界面の酸化反応を左右し、従って酸化膜の成長速度を左右する。この理論は、Deal-Grove 理論と格子間 Si 原子拡散理論の双方の自然な拡張となっている。

この理論の優れた点は、初期増速酸化現象が自然と説明できることである(図 S3)。酸化膜が極薄い酸化の初期には、ほとんどの格子間 Si 原子は酸化膜表面にすぐに到達しそこで酸化されて酸化膜に吸収されてしまうので、界面に格子間 Si 原子が蓄積することはない。このため界面での酸化反応は抑制されることなく急速に進み、酸化膜厚も急速に増す。一方、しばらくして酸化膜厚が一定の厚さを越えると、格子間 Si 原子は酸化膜中をゆっくり拡散しなかなか酸化されないで、界面に格子間 Si 原子が蓄積してしまう。今度は界面での酸化反応が抑制されてしまい、結果酸化膜厚の増加速度がゆっくりとなる。酸化膜厚が初期に急速に増しその後ゆっくりと増すことになるので、初期増速酸化現象を説明することとなるが、初期以外減速酸

化といった方が実体に近いという理屈である。我々は解析的に初期増速酸化現象の経験則[17]を再現することを示すと共に[16]、全ての物理パラメータにアレニウス型の温度依存性を考え活性化障壁高さの多くには文献値を使うことで、数値シミュレーションにより様々な酸化条件の実験結果を再現出来ることを示した[18-20]。

また Si 放出理論では、界面付近を中心に格子間 Si 原子が酸化膜中に残留していることとなり、これが酸化膜中の固定電荷や欠陥の起源と説明することができる[21-23]。酸化膜表面に新しく酸化された領域があることも酸化膜を拡散した格子間 Si 原子が表面に析出し、これが酸化されるためだと説明することができる。このように Si 放出理論は、従来の Deal-Grove 理論で説明できなかった多

Si 放出理論は、このように酸化中に酸素だけでなく Si

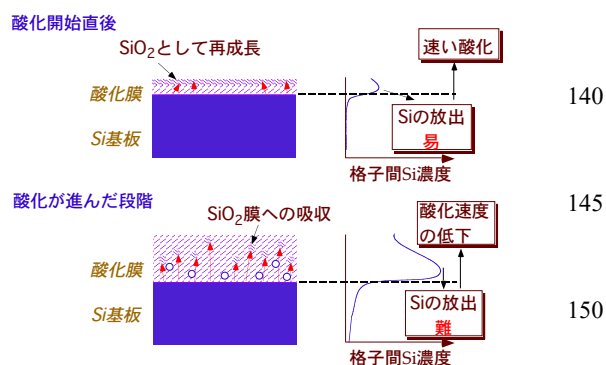

図 S3. Si 放出理論による初期増速酸化現象の説明

原子も輸送され、その Si 原子の輸送が基板 Si 結晶中だけでなく酸化膜中でも生じるとしているため、Si 酸化膜中の Si 原子の輸送がポイントである。実験的には、例えば high-k 膜をシリコン表面に堆積する際に high-k 膜中へ Si の混入が生じ、その分布が high-k 膜表面と界面で濃いという現象が、界面での酸化による格子間 Si 原子の発生と酸化膜表面への格子間 Si 原子の拡散という Si 原子の輸送現象の存在を示唆している[24]。実際、界面で酸化反応が生じなければこのような Si の分布が発生しないことが、実験的に確認されている[25,26]。また、Si 酸化膜/Si 界面の Si のラフネスは界面から離れた部分を格子間 Si 原子が拡散しているとするので始めて合理的に説明することができる[27-29]。さらに同位体 Si を使って酸化膜中での Si の拡散を調べると、格子間 Si 原子と関連する速い拡散種の存在が確認できる[30-33]。そして酸化膜中の B の拡散はこの速い拡散種の存在で矛盾無く説明することができる[34-37]。我々はこの拡散種が、より正確には格子間 Si 原子ではなく格子間 SiO 分子であると考えている[21,38-40]。界面 Si 放出量の面方位依存性は、第一原理計算による検討で(111)>(110)>(310)>(100)であることが確認出来ている[41,42]。

## 文献

- 1) B. E. Deal and A. S. Grove: J. Appl. Phys. **36**, 3770 (1965).
- 2) C. J. Han and C. R. Helms: J. Electrochem. Soc. **135**, 1824 (1988).
- 3) H. C. Lu, T. Gustafsson, E. P. Gusev, and E. Garfunkel: Appl. Phys. Lett. **67**, 1742 (1995).
- 4) T. Y. Tan and U. Gösele: Appl. Phys. Lett. **39**, 68 (1981).
- 5) T. Y. Tan and U. Gösele: Appl. Phys. A **37**, 1 (1985).
- 6) S. Mizuo and H. Higuchi: Jpn. J. Appl. Phys. **20**, 739 (1981).
- 7) D. J. D. Thomas: Phys. Stat. Sol. **3**, 2261 (1963).
- 8) S. M. Hu: J. Vac. Sci. Technol. **14**, 17 (1977).
- 9) A. Pasquarello, M. S. Hybertsen, and R. Car: Nature **396**, 58 (1998).
- 10) H. Kageshima and K. Shiraishi: Appl. Surf. Sci. **130-132**, 176 (1998).
- 11) H. Kageshima and K. Shiraishi: Phys. Rev. Lett. **81**, 5936 (1998).
- 12) S. T. Dunham and J. D. Plummer: J. Appl. Phys. **59**, 2541 (1986).
- 13) S. T. Dunham and J. D. Plummer: J. Appl. Phys. **59**, 2551 (1986).
- 14) K. Taniguchi, Y. Shibata, and C. Hamaguchi: J. Appl. Phys. **65**, 2723 (1989).
- 15) S. T. Dunham: J. Appl. Phys. **71**, 685 (1992).
- 16) H. Kageshima, K. Shiraishi, and M. Uematsu: Jpn. J. Appl. Phys. **38**, L971 (1999).
- 17) H. Z. Massoud, J. D. Plummer, and E. A. Irene, J. Electrochem. Soc. **132**, 2685 (1985).
- 18) M. Uematsu, H. Kageshima, and K. Shiraishi, Jpn. J. Appl. Phys. **39**, L699 (2000).
- 19) M. Uematsu, H. Kageshima, and K. Shiraishi, Jpn. J. Appl. Phys. **39**, L952 (2000).
- 20) M. Uematsu, H. Kageshima, and K. Shiraishi, Jpn. J. Appl. Phys. **39**, L1135 (2000). [
- 21) H. Kageshima, M. Uematsu, K. Akagi, S. Tsuneyuki, T. Akiyama, and K. Shiraishi, Jpn. J. Appl. Phys. **45**, 694 (2006).
- 22) R. Hasunuma, Y. Hayashi, M. Ota, and K. Yamabe, Jpn. J. Appl. Phys. **52**, 031301 (2013).
- 23) R. Hasunuma, H. Kawamura, and K. Yamabe, Jpn. J. Appl. Phys. **57**, 06KB05 (2018).
- 24) H. Watanabe, Appl. Phys. Lett. **81**, 4221 (2002).
- 25) S. Hosoi, K. Nakajima, M. Suzuki, K. Kimura, Y. Shimizu, S. Fukatsu, K. M. Itoh, M. Uematsu, H. Kageshima, and K. Shiraishi, Nucl. Instr. Meth. Phys. Res. B **249**, 390 (2006).
- 26) M. Zhao, K. Nakajima, M. Suzuki, K. Kimura, M. Uematsu, K. Torii, S. Kamiyama, Y. Nara, H. Watanabe, K. Shiraishi, T. Chikyow, and K. Yamada, Appl. Phys. Lett. **90**, 133510 (2007).
- 27) D. J. Bottomley, H. Omi, Y. Kobayashi, M. Uematsu, H. Kageshima, and T. Ogino, Phys. Rev. B **66**, 035301 (2002).
- 28) H. Omi, H. Kageshima, and M. Uematsu, Phys. Rev. Lett. **97**, 016102 (2006).
- 29) H. Omi, H. Kageshima, T. Kawamura, M. Uematsu, Y. Kobayashi, S. Fujikawa, Y. Tsusaka, Y. Kagoshima, and J. Matsui, Phys. Rev. B **79**, 245319 (2009).
- 30) T. Takahashi, S. Fukatsu, K. M. Itoh, M. Uematsu, A. Fujiwara, H. Kageshima, Y. Takahashi, and K. Shiraishi, J. Appl. Phys. **93**, 3674 (2003).
- 31) S. Fukatsu, T. Takahashi, K. M. Itoh, M. Uematsu, A. Fujiwara, H. Kageshima, Y. Takahashi, K. Shiraishi, and U. Gösele, Appl. Phys. Lett. **83**, 3897 (2003).
- 32) S. Fukatsu, T. Takahashi, K. M. Itoh, M. Uematsu, A. Fujiwara, H. Kageshima, Y. Takahashi, and K. Shiraishi, Jpn. J. Appl. Phys. **42**, L1492 (2003).
- 33) M. Uematsu, H. Kageshima, Y. Takahashi, S. Fukatsu, K. M. Itoh, K. Shiraishi, and U. Gösele, Appl. Phys. Lett. **84**, 876 (2004).
- 34) M. Uematsu, H. Kageshima, Y. Takahashi, S. Fukatsu, K. M. Itoh, K. Shiraishi, and U. Gösele, Appl. Phys. Lett. **85**, 221 (2004).
- 35) S. Fukatsu, K. M. Ito, M. Uematsu, H. Kageshima, Y. Takahashi, and K. Shiraishi, Jpn. J. Appl. Phys. **43**, 7837 (2004).
- 36) M. Uematsu, H. Kageshima, Y. Takahashi, S. Fukatsu, K. M. Ito, and K. Shiraishi, J. Appl. Phys. **96**, 5513 (2004).
- 37) M. Uematsu, H. Kageshima, S. Fukatsu, K. M. Itoh, K. Shiraishi, M. Ohtani, and A. Oshiyama, Thin Solid Films **508**, 270 (2006).
- 38) H. Kageshima, M. Uematsu, K. Akagi, S. Tsuneyuki, T. Akiyama, and K. Shiraishi, Jpn. J. Appl. Phys. **43**, 8223 (2004).
- 39) H. Kageshima, M. Uematsu, K. Akagi, S. Tsuneyuki, T. Akiyama, and K. Shiraishi, e-J. Surf. Sci. Nanotech. **4**, 584 (2006).
- 40) H. Kageshima, M. Uematsu, K. Akagi, S. Tsuneyuki, T. Akiyama, and K. Shiraishi, Physica B **376-377**, 407 (2006).
- 41) S. Kawachi, H. Shirakawa, M. Aradai, H. Kageshima, T. Endoh, and K. Shiraishi: ECS Trans. **75**, 293 (2016).
- 42) T. Nagura, S. Kawachi, K. Chokawa, H. Shirakawa, M. Aradai, H. Kageshima, T. Endoh, and K. Shiraishi, Jpn. J. Appl. Phys. **57**, 04FB06 (2018).
